# Supplementary material for: Association of Maternal Insecticide Levels With Autism in Offspring From a National Birth Cohort
Source: Atypon-hosted journal article supplement (doi:10.1176/appi.ajp.2018.17101129), 2018-08-22
Supplement: appi.ajp.2018.17101129.ds001.pdf [file appi.ajp.2018.17101129.ds001.pdf]

Supplemental Tables:

Supplemental Table 1: Pearson correlation coefficients for individual maternal persistent organic pollutant levels among controls (N=778). Shading scale represents low to high (yellow to green) correlation

|                   | p,p'-DDE | Total PCBs | PCB 74 | PCB 99 | PCB 118 | PCB 153 | PCB 138 | PCB 156 | PCB 187 | PCB 183 | PCB 180 | PCB 170 |
|-------------------|----------|------------|--------|--------|---------|---------|---------|---------|---------|---------|---------|---------|
| <b>p,p'-DDE</b>   | 1.00     | 0.40       | 0.48   | 0.64   | 0.53    | 0.39    | 0.45    | 0.40    | 0.30    | 0.36    | 0.25    | 0.25    |
| <b>Total PCBs</b> | 0.40     | 1.00       | 0.74   | 0.75   | 0.82    | 0.99    | 0.98    | 0.97    | 0.96    | 0.97    | 0.95    | 0.95    |
| <b>PCB 74</b>     | 0.48     | 0.74       | 1.00   | 0.76   | 0.82    | 0.70    | 0.74    | 0.73    | 0.64    | 0.67    | 0.62    | 0.63    |
| <b>PCB 99</b>     | 0.64     | 0.75       | 0.76   | 1.00   | 0.89    | 0.74    | 0.81    | 0.76    | 0.61    | 0.68    | 0.56    | 0.57    |
| <b>PCB 118</b>    | 0.53     | 0.82       | 0.82   | 0.89   | 1.00    | 0.79    | 0.84    | 0.80    | 0.71    | 0.75    | 0.66    | 0.66    |
| <b>PCB 153</b>    | 0.39     | 0.99       | 0.70   | 0.74   | 0.79    | 1.00    | 0.98    | 0.96    | 0.97    | 0.97    | 0.94    | 0.94    |
| <b>PCB 138</b>    | 0.45     | 0.98       | 0.74   | 0.81   | 0.84    | 0.98    | 1.00    | 0.94    | 0.94    | 0.97    | 0.89    | 0.90    |
| <b>PCB 156</b>    | 0.40     | 0.97       | 0.73   | 0.76   | 0.80    | 0.96    | 0.94    | 1.00    | 0.91    | 0.89    | 0.93    | 0.93    |
| <b>PCB 187</b>    | 0.30     | 0.96       | 0.64   | 0.61   | 0.71    | 0.97    | 0.94    | 0.91    | 1.00    | 0.96    | 0.95    | 0.94    |
| <b>PCB 183</b>    | 0.36     | 0.97       | 0.67   | 0.68   | 0.75    | 0.97    | 0.97    | 0.89    | 0.96    | 1.00    | 0.91    | 0.92    |
| <b>PCB 180</b>    | 0.25     | 0.95       | 0.62   | 0.56   | 0.66    | 0.94    | 0.89    | 0.93    | 0.95    | 0.91    | 1.00    | 0.99    |
| <b>PCB 170</b>    | 0.25     | 0.95       | 0.63   | 0.57   | 0.66    | 0.94    | 0.90    | 0.93    | 0.94    | 0.92    | 0.99    | 1.00    |

Supplemental Table 2: Comparison of demographic, clinical, and other characteristics between study subjects not selected vs. selected for inclusion in the study

| Characteristic                                  | Not Included      | Included          | Chi squared P-Value   |
|-------------------------------------------------|-------------------|-------------------|-----------------------|
|                                                 | (N=4091)<br>N (%) | (N=1556)<br>N (%) |                       |
| <b>Birth year</b>                               |                   |                   | <0.0001               |
| 1987-1990                                       | 623 (15.2)        | 136 (8.7)         |                       |
| 1991-1993                                       | 1076 (26.3)       | 418 (26.9)        |                       |
| 1994-1996                                       | 1012 (24.7)       | 416 (26.7)        |                       |
| 1997-2005                                       | 1380 (33.7)       | 586 (37.7)        |                       |
| <b>Maternal age</b>                             |                   |                   | 0.53                  |
| ≤19                                             | 88 (2.2)          | 30 (1.9)          |                       |
| 20-24                                           | 602 (14.7)        | 241 (15.5)        |                       |
| 25-29                                           | 1404 (34.3)       | 511 (32.8)        |                       |
| 30-34                                           | 1253 (30.6)       | 461 (29.6)        |                       |
| 35-39                                           | 616 (15.1)        | 257 (16.5)        |                       |
| 40+                                             | 128 (3.1)         | 56 (3.6)          |                       |
| <b>Sex</b>                                      |                   |                   | 0.21                  |
| Male                                            | 3249 (79.4)       | 1212 (77.9)       |                       |
| Female                                          | 842 (20.6)        | 344 (22.1)        |                       |
| <b>Parity</b>                                   |                   |                   | 0.15                  |
| 0                                               | 1242 (30.5)       | 443 (28.6)        |                       |
| 1                                               | 1214 (29.8)       | 507 (32.7)        |                       |
| 2                                               | 806 (19.8)        | 311 (20.1)        |                       |
| 3+                                              | 808 (19.9)        | 289 (18.7)        |                       |
| <b>Maternal socioeconomic status</b>            |                   |                   | 0.93                  |
| Upper white collar workers                      | 487 (15.2)        | 195 (15)          |                       |
| Lower white collar workers                      | 1450 (45.2)       | 589 (45.3)        |                       |
| Blue collar workers                             | 676 (21.1)        | 265 (20.4)        |                       |
| Others                                          | 595 (18.6)        | 250 (19.3)        |                       |
| <b>Maternal psychiatric history<sup>1</sup></b> |                   |                   | 0.01                  |
| No                                              | 3645 (89.1)       | 1349 (86.7)       |                       |
| Yes                                             | 446 (10.9)        | 207 (13.3)        |                       |
| <b>Parental psychiatric history<sup>1</sup></b> |                   |                   | 0.04                  |
| No                                              | 3281 (80.2)       | 1210 (77.8)       |                       |
| Yes                                             | 810 (19.8)        | 346 (22.2)        |                       |
|                                                 | <b>Mean (SD)</b>  | <b>Mean (SD)</b>  | <b>t-test P-value</b> |
| <b>Gestational age at blood draw</b>            | 11.1 (3.5)        | 10.9 (3.4)        | 0.24                  |
| <b>Maternal age</b>                             | 29.5 (5.3)        | 29.7 (5.3)        | 0.27                  |

<sup>1</sup> See definition in Table 1
